# Supplementary material for: Biofilms in Surgical Site Infections: Recent Advances and Novel Prevention and Eradication Strategies
Source: MDPI journal article supplement (doi:10.3390/antibiotics11010069), 2022-01-07
Supplement: s1 [file s1]

## **Supplementary Materials**

### **Biofilms in Surgical Site Infections: Recent Advances and Novel Prevention and Eradication Strategies**

Andriy Hrynyshyn, Manuel Simões and Anabela Borges

1. Table S1: Recent studies on the use of nanoparticle and phytochemical-based approaches to counteract biofilm-related SSIs.

**Table S1.** Recent studies on the use of nanoparticle and phytochemical-based approaches to counteract biofilm-related SSIs.

| Antibiofilm Strategy |                                                                                                |                                                          | Microorganism(s)     | Source(s)                         | Mechanism(s) of action                                                                                                                                                                                                                                                                                                                                                                                                                                                                                                                                                                                                                                             | Reference |
|----------------------|------------------------------------------------------------------------------------------------|----------------------------------------------------------|----------------------|-----------------------------------|--------------------------------------------------------------------------------------------------------------------------------------------------------------------------------------------------------------------------------------------------------------------------------------------------------------------------------------------------------------------------------------------------------------------------------------------------------------------------------------------------------------------------------------------------------------------------------------------------------------------------------------------------------------------|-----------|
| Approach             | Compound(s)                                                                                    | Method(s)                                                |                      |                                   |                                                                                                                                                                                                                                                                                                                                                                                                                                                                                                                                                                                                                                                                    |           |
| Nanoparticles        | AgNPs                                                                                          | Coating of silk sutures                                  | <i>C. albicans</i>   | ATCC 10239                        | Protein-AgNP interactions, inhibition of DNA replication, disruption of the microbial cell wall and induced formation of ROS                                                                                                                                                                                                                                                                                                                                                                                                                                                                                                                                       | [1]       |
|                      |                                                                                                |                                                          | <i>E. coli</i>       | ATCC 25922                        |                                                                                                                                                                                                                                                                                                                                                                                                                                                                                                                                                                                                                                                                    |           |
|                      |                                                                                                |                                                          | <i>S. aureus</i>     | ATCC 25923                        |                                                                                                                                                                                                                                                                                                                                                                                                                                                                                                                                                                                                                                                                    |           |
|                      | AgNPs                                                                                          | Coating of silk sutures                                  | <i>S. aureus</i>     | ATCC 25923 + clinical isolate(s)  | Attachment of AgNPs to cell membrane and penetration into the cytoplasm, causing cell lysis.                                                                                                                                                                                                                                                                                                                                                                                                                                                                                                                                                                       | [2]       |
|                      |                                                                                                |                                                          | <i>A. baumannii</i>  | ATCC 19606 + clinical isolate(s)  |                                                                                                                                                                                                                                                                                                                                                                                                                                                                                                                                                                                                                                                                    |           |
|                      |                                                                                                |                                                          | <i>E. coli</i>       | ATCC 25922 + clinical isolate(s)  |                                                                                                                                                                                                                                                                                                                                                                                                                                                                                                                                                                                                                                                                    |           |
|                      |                                                                                                |                                                          | <i>K. pneumoniae</i> | ATCC 700603 + clinical isolate(s) |                                                                                                                                                                                                                                                                                                                                                                                                                                                                                                                                                                                                                                                                    |           |
|                      |                                                                                                |                                                          | <i>P. aeruginosa</i> | ATCC 27853 + clinical isolate(s)  |                                                                                                                                                                                                                                                                                                                                                                                                                                                                                                                                                                                                                                                                    |           |
|                      | TCA, “Cinn” and PI-based AgNPs<br><br>(TCA-AgNPs; TCA-AgNPs-PI; Cinn-AgNPs; and Cinn-AgNPs-PI) | Combination with phytochemicals + coating of PGA sutures | <i>S. pneumoniae</i> | ATCC 49619                        | TCA, in an acidic environment, remains lipophilic and enters the bacterial cell membrane; establishes electrostatic interactions, leading to adsorption, deformation of the membranes and its destruction; it has a phenolic ring which interacts with the proteins in the cytoplasmic membranes and causes leakage of cell constituents; it is oxidizing to AgNPs, causing Ag <sup>+</sup> ions release, which are detrimental for the cell membranes.<br><br>PI has microbicidal activity due to release of free molecular iodine.<br><br>“Cinn” has biocidal properties and in water forms a high amount of cinnamaldehyde, which is oxidized to cinnamic acid. | [3]       |
|                      |                                                                                                |                                                          | <i>S. aureus</i>     | ATCC 25923                        |                                                                                                                                                                                                                                                                                                                                                                                                                                                                                                                                                                                                                                                                    |           |
|                      |                                                                                                |                                                          | <i>E. faecalis</i>   | ATCC 29212                        |                                                                                                                                                                                                                                                                                                                                                                                                                                                                                                                                                                                                                                                                    |           |
|                      |                                                                                                |                                                          | <i>S. pyogenes</i>   | ATCC 19615                        |                                                                                                                                                                                                                                                                                                                                                                                                                                                                                                                                                                                                                                                                    |           |
|                      |                                                                                                |                                                          | <i>B. subtilis</i>   | Clinical isolate(s)               |                                                                                                                                                                                                                                                                                                                                                                                                                                                                                                                                                                                                                                                                    |           |
|                      |                                                                                                |                                                          | <i>P. aeruginosa</i> | WDCM 00026 Vitroids               |                                                                                                                                                                                                                                                                                                                                                                                                                                                                                                                                                                                                                                                                    |           |
|                      |                                                                                                |                                                          | <i>E. coli</i>       | WDCM 00013 Vitroids               |                                                                                                                                                                                                                                                                                                                                                                                                                                                                                                                                                                                                                                                                    |           |
|                      |                                                                                                |                                                          | <i>P. mirabilis</i>  | ATCC 29906                        |                                                                                                                                                                                                                                                                                                                                                                                                                                                                                                                                                                                                                                                                    |           |
|                      |                                                                                                |                                                          | <i>K. pneumoniae</i> | WDCM 0007 Vitroids                |                                                                                                                                                                                                                                                                                                                                                                                                                                                                                                                                                                                                                                                                    |           |
|                      |                                                                                                |                                                          | <i>C. albicans</i>   | WDCM 00054 Vitroids               |                                                                                                                                                                                                                                                                                                                                                                                                                                                                                                                                                                                                                                                                    |           |
|                      | AgNPs                                                                                          | Coating of nylon sutures                                 | <i>S. aureus</i>     | ATCC 25923                        | The increased surface area of the AgNPs provides better contact with microorganisms, leading to attachment of NPs to cell membrane, penetration into the cytoplasm and cell lysis.                                                                                                                                                                                                                                                                                                                                                                                                                                                                                 | [4]       |
|                      |                                                                                                |                                                          | <i>E. coli</i>       | ATCC 25922                        |                                                                                                                                                                                                                                                                                                                                                                                                                                                                                                                                                                                                                                                                    |           |
|                      |                                                                                                |                                                          | <i>P. aeruginosa</i> | ATCC 27853                        |                                                                                                                                                                                                                                                                                                                                                                                                                                                                                                                                                                                                                                                                    |           |
|                      |                                                                                                |                                                          | <i>A. baumannii</i>  | ATCC 19606                        |                                                                                                                                                                                                                                                                                                                                                                                                                                                                                                                                                                                                                                                                    |           |

|  |                                                                                           |                                                             |                      |                            |                                                                                                                                                                                                                                                |      |
|--|-------------------------------------------------------------------------------------------|-------------------------------------------------------------|----------------------|----------------------------|------------------------------------------------------------------------------------------------------------------------------------------------------------------------------------------------------------------------------------------------|------|
|  |                                                                                           |                                                             | <i>K. pneumoniae</i> | ATCC 700603                |                                                                                                                                                                                                                                                |      |
|  | Ag <sup>+</sup> -TiO <sub>2</sub> NPs (TIAB) + <i>Aloe vera</i> extract + hyaluronic acid | Coating of braided multifilament sutures                    | <i>S. aureus</i>     | ATCC 29213                 | Ag <sup>+</sup> ions cause bacterial proteins inactivation, inhibition of DNA replication, modulation of gene expression, blockade of the electron transport chain with the consequent reduction of ATP, and ultimately, interference with QS. | [5]  |
|  |                                                                                           |                                                             | <i>E. faecalis</i>   | ATCC 29212                 |                                                                                                                                                                                                                                                |      |
|  |                                                                                           |                                                             | <i>E. coli</i>       | ATCC 25922                 |                                                                                                                                                                                                                                                |      |
|  | AgNPs                                                                                     | Coating of cotton gauze wound dressings                     | <i>E. coli</i>       | ATCC 25922                 | Ag <sup>+</sup> ions are responsible for the bactericidal activity, by disrupting the vital biomolecules of bacteria (cell membrane, DNA and enzymes).                                                                                         | [6]  |
|  |                                                                                           |                                                             | <i>S. aureus</i>     | ATCC 6538                  |                                                                                                                                                                                                                                                |      |
|  |                                                                                           |                                                             | MRSA                 | ATCC 33591                 |                                                                                                                                                                                                                                                |      |
|  | AgNPs + gentamicin                                                                        | Coating of a porous structure on a titanium implant surface | <i>S. aureus</i>     | ATCC 25923                 | Induced production of ROS.                                                                                                                                                                                                                     | [7]  |
|  |                                                                                           |                                                             |                      |                            | Combination of AgNPs and gentamicin creates a synergistic effect.                                                                                                                                                                              |      |
|  | AgNPs + CaPNPs                                                                            | Coating of Ti6Al4V metallic scaffolds                       | <i>S. aureus</i>     | NCTC 657                   | Gentamicin targets and attacks the 30S ribosomal subunit.                                                                                                                                                                                      | [8]  |
|  |                                                                                           |                                                             |                      |                            | Ag <sup>+</sup> ions release has antibacterial effects.                                                                                                                                                                                        |      |
|  | AgNPs                                                                                     | Targeted delivery of NPs using DMNs                         | <i>S. aureus</i>     | ATCC 25923                 | PEI used to stabilize CaPNPs has antibacterial and toxic effects to cells because of its positive charge, which affects cell membranes.                                                                                                        | [9]  |
|  |                                                                                           |                                                             |                      |                            | Disturbed membrane permeability, leading to its disruption, leakage of intracellular content, damage to DNA and death of bacterial cells.                                                                                                      |      |
|  | PLGA-NPs and PCL-NPs                                                                      | Targeted delivery of NPs using doxycycline DMNs             | <i>P. aeruginosa</i> | ATCC 9027                  | Incorporation of AgNPs into microparticles of PCL coated with chitosan and delivery through DMNs reduces toxicity and enhances antibiofilm activity at the exact area of infection.                                                            | [10] |
|  |                                                                                           |                                                             |                      |                            | PLGA and PCL coated with chitosan NPs improve adhesion to bacterial biofilms.                                                                                                                                                                  |      |
|  | CAR PCL-NPs                                                                               | Combination with phytochemicals +                           | <i>S. aureus</i>     | NCTC 10788 + ATCC BAA-1707 | Doxycycline has bactericidal effects.                                                                                                                                                                                                          | [11] |
|  |                                                                                           |                                                             |                      |                            | DMNs allow better penetration at the targeted area of infection.                                                                                                                                                                               |      |
|  | CAR PCL-NPs                                                                               | Combination with phytochemicals +                           | <i>S. aureus</i>     | NCTC 10788 + ATCC BAA-     | CAR interacts with cell membrane and promotes loss of integrity (hydrophobic nature).                                                                                                                                                          | [11] |
|  |                                                                                           |                                                             |                      |                            |                                                                                                                                                                                                                                                |      |

|  |                            |                                                                                    |                           |                            |                                                                                                                                                                                                                                                                                                                                                                                                                                                          |      |
|--|----------------------------|------------------------------------------------------------------------------------|---------------------------|----------------------------|----------------------------------------------------------------------------------------------------------------------------------------------------------------------------------------------------------------------------------------------------------------------------------------------------------------------------------------------------------------------------------------------------------------------------------------------------------|------|
|  |                            | targeted delivery of NPs using microneedle liquid injection system                 |                           | 1707 + ATCC 33593          | <p>CAR's slightly hydrophilic side enhances its diffusion through the biofilm EPS matrix.</p> <p>Encapsulation of CAR in NPs improves its antimicrobial activity.</p> <p>Microneedle liquid injection system improves site-specific delivery of CAR-PCL NPs.</p>                                                                                                                                                                                         |      |
|  |                            |                                                                                    | <i>P. aeruginosa</i>      | ATCC 9027 + ATCC BAA-47    |                                                                                                                                                                                                                                                                                                                                                                                                                                                          |      |
|  | CAR PCL-NPs                | Combination with phytochemicals + targeted delivery of NPs using a hydrogel system | MRSA                      | ATCC 33593 + ATCC BAA-1707 | <p>CAR disrupts proton gradients and inhibits adenosine triphosphate (ATP) synthesis.</p> <p>CAR hinders efflux pumps, produces ROS, suppresses enterotoxin and coagulase virulence factors and, overall, inhibits QS.</p> <p>CAR-loaded PCL-NPs prolong the availability of CAR in skin layers, thereby improving its antibacterial activity.</p> <p>Loading NPs into the hydrogel increases the retaining of NPs in the skin for longer durations.</p> | [12] |
|  | Photothermal PDA-NPs       | NIR irradiation of photothermal NPs                                                | <i>E. faecium</i> W54     | –                          | <p>Photothermal NPs convert NIR-light into heat and generate high, local temperatures that imply lethal damage to cell wall components, eDNA and other intra- or extra-cellular material.</p> <p>NIR-irradiation can be confined to the infection site and heat helps to dissipate NPs in the biofilm.</p>                                                                                                                                               | [13] |
|  |                            |                                                                                    | <i>S. aureus</i>          | ATCC 12600                 |                                                                                                                                                                                                                                                                                                                                                                                                                                                          |      |
|  |                            |                                                                                    | <i>K. pneumoniae</i>      | –                          |                                                                                                                                                                                                                                                                                                                                                                                                                                                          |      |
|  |                            |                                                                                    | <i>A. baumannii</i>       | –                          |                                                                                                                                                                                                                                                                                                                                                                                                                                                          |      |
|  |                            |                                                                                    | <i>P. aeruginosa</i> PA01 | –                          |                                                                                                                                                                                                                                                                                                                                                                                                                                                          |      |
|  |                            |                                                                                    | <i>E. cloacae</i> BS1037  | –                          |                                                                                                                                                                                                                                                                                                                                                                                                                                                          |      |
|  |                            |                                                                                    | <i>E. faecalis</i> 1396   | –                          |                                                                                                                                                                                                                                                                                                                                                                                                                                                          |      |
|  | <sup>D</sup> /L-Glu AuNBPs | <i>In vivo</i> injection of NPs + NIR-irradiation                                  | <i>S. epidermidis</i>     | –                          | <p><sup>D</sup>/L-Glu functionalization enhances the targeting and interactions of AuNBPs with bacterial cell walls leading to biological restriction of nucleic acids.</p> <p>The sharp tips and small size of AuNBPs enable the penetration into bacterial cell wall and</p>                                                                                                                                                                           | [14] |
|  |                            |                                                                                    | <i>E. coli</i>            | –                          |                                                                                                                                                                                                                                                                                                                                                                                                                                                          |      |

|  |                                                                              |                                                          |                                |                     |                                                                                                                                                                                                                                                                                                                                                                                                                                                      |      |
|--|------------------------------------------------------------------------------|----------------------------------------------------------|--------------------------------|---------------------|------------------------------------------------------------------------------------------------------------------------------------------------------------------------------------------------------------------------------------------------------------------------------------------------------------------------------------------------------------------------------------------------------------------------------------------------------|------|
|  |                                                                              |                                                          |                                |                     | biofilms and cause damage and leakage of components.                                                                                                                                                                                                                                                                                                                                                                                                 |      |
|  |                                                                              |                                                          |                                |                     | The targeting to bacterial wall enhances photothermal therapy against biofilm infections.                                                                                                                                                                                                                                                                                                                                                            |      |
|  | AuNPs + gentamicin or amikacin                                               | Targeted laser therapy + antibiotics                     | MRSA SA5120                    | Clinical isolate(s) | AuNPs-targeted laser therapy induces photothermal destruction of the EPS matrix and cellular components of the biofilm and potentiates the antibiofilm activity of gentamicin and amikacin.                                                                                                                                                                                                                                                          | [15] |
|  |                                                                              |                                                          | <i>P. aeruginosa</i> PA 60–65  | Clinical isolate(s) |                                                                                                                                                                                                                                                                                                                                                                                                                                                      |      |
|  | MNPS-NPs                                                                     | Intravenous injection of magnetic NPs + magnetic implant | <i>S. aureus</i> JSNZ wildtype | –                   | <p>MNPS-NPs contain a superparamagnetic iron oxide core, allowing for targeted accumulation of NPs in the infection site.</p> <p>The nanoporous silica shell of the NPs can carry large amounts of drug.</p>                                                                                                                                                                                                                                         | [16] |
|  | ZnO-NPs                                                                      | Multilayer coating of PVC bed sheet                      | <i>S. aureus</i>               | DMST 8013           | <p>ZnO-NPs release ROS and Zn<sup>2+</sup> ions which reduce the activity of Zn<sup>2+</sup>–dependent enzymes and transcription factors and/or cause lysosomal destabilization in the cell, leading to its death.</p> <p>ZnO-NPs produce H<sub>2</sub>O<sub>2</sub> under UV light irradiation that has toxic effects to living cells.</p> <p>ZnO-NPs increases hydrophobicity of the coated material and provides good antibacterial activity.</p> | [17] |
|  |                                                                              |                                                          | <i>S. epidermidis</i>          | DMST 15505          |                                                                                                                                                                                                                                                                                                                                                                                                                                                      |      |
|  |                                                                              |                                                          | <i>E. coli</i>                 | DMST 4212           |                                                                                                                                                                                                                                                                                                                                                                                                                                                      |      |
|  |                                                                              |                                                          | <i>P. aeruginosa</i>           | DMST 4739           |                                                                                                                                                                                                                                                                                                                                                                                                                                                      |      |
|  | PCL-NPs + <i>Thymus capitatus</i> and <i>Origanum vulgare</i> essential oils | Combination with phytochemicals + nanoencapsulation      | <i>S. aureus</i>               | CCM 4223            | Encapsulation reduces the loss of bioactivity of the phytochemicals, improves antibacterial and antibiofilm effects, and reduces cytotoxicity to host cells.                                                                                                                                                                                                                                                                                         | [18] |
|  |                                                                              |                                                          | <i>E. coli</i>                 | CCM 3988            |                                                                                                                                                                                                                                                                                                                                                                                                                                                      |      |
|  |                                                                              |                                                          | <i>C. albicans</i> SC 5314     | –                   |                                                                                                                                                                                                                                                                                                                                                                                                                                                      |      |
|  | PDA colloidal particles coated internally and externally with AgNPs          | Protective sandwich-structured shells coated with NPs    | <i>E. coli</i>                 | ATCC 25922          | AgNPs deactivate bacterial cells by interacting with sulfide-groups within enzymes and proteins and cause structural changes and functional damage to the cell membrane, leading to cell death.                                                                                                                                                                                                                                                      | [19] |
|  |                                                                              |                                                          | <i>S. aureus</i>               | ATCC 29213          |                                                                                                                                                                                                                                                                                                                                                                                                                                                      |      |

|                |                                                                                       |                                                                   |                            |            |                                                                                                                                                                                                                                                                                                                                                                                                                                                                                                                                                                                                                  |      |
|----------------|---------------------------------------------------------------------------------------|-------------------------------------------------------------------|----------------------------|------------|------------------------------------------------------------------------------------------------------------------------------------------------------------------------------------------------------------------------------------------------------------------------------------------------------------------------------------------------------------------------------------------------------------------------------------------------------------------------------------------------------------------------------------------------------------------------------------------------------------------|------|
|                | (AgNPs-PDA-AgNPs shells)                                                              |                                                                   |                            |            | The enhanced antibacterial activity is due to the unique sandwich structure of the samples, in which the external AgNPs offer a rapid and intense release of Ag <sup>+</sup> ions because of the direct contact to the surroundings, while the internal AgNPs provide a slow yet sustained release of Ag <sup>+</sup> ions due to the obstruction of the PDA shell.                                                                                                                                                                                                                                              |      |
|                | PAA IO-NPs                                                                            | Polymer capped NPs                                                | <i>E. coli</i>             | ATCC 25922 | The carboxyl groups on the surface of PAA IO-NPs allows the localized deposition of the NPs on the biofilms, which exhibit bioactivity under a low pH environment. This leads to the production of free radicals, which degrade the EPS structure, dispersing the biofilms and killing bacteria embedded within biofilms.                                                                                                                                                                                                                                                                                        | [20] |
|                |                                                                                       |                                                                   | <i>S. aureus</i>           | ATCC 6538  |                                                                                                                                                                                                                                                                                                                                                                                                                                                                                                                                                                                                                  |      |
|                |                                                                                       |                                                                   | MRSA                       | ATCC 33592 |                                                                                                                                                                                                                                                                                                                                                                                                                                                                                                                                                                                                                  |      |
|                | NH <sub>2</sub> -FF-COOH nanotubes                                                    | –                                                                 | <i>S. aureus</i>           | NCTC 10788 | Formation of ion channels and/or surfactant-like action, capable of degrading the biofilm matrix and disrupting cell membranes, leading to cell death in Gram-positive bacterial isolates.                                                                                                                                                                                                                                                                                                                                                                                                                       | [21] |
|                |                                                                                       |                                                                   | <i>E. coli</i>             | ATCC 15597 |                                                                                                                                                                                                                                                                                                                                                                                                                                                                                                                                                                                                                  |      |
|                |                                                                                       |                                                                   | <i>S. epidermidis</i>      | ATCC 12228 |                                                                                                                                                                                                                                                                                                                                                                                                                                                                                                                                                                                                                  |      |
|                |                                                                                       |                                                                   | <i>P. aeruginosa</i>       | ATCC 15692 |                                                                                                                                                                                                                                                                                                                                                                                                                                                                                                                                                                                                                  |      |
|                | Dendrons with OH, COO <sup>-</sup> and NH <sub>3</sub> <sup>+</sup> peripheral groups | Penetration into biofilm layers + drug-carrier dendritic polymers | <i>P. aeruginosa</i>       | ATCC 39324 | <p>The OH groups remain uncharged inside <i>P. aeruginosa</i> biofilms. EPS components and bacterial cell surfaces, remain negatively charged around pH 6.5.</p> <p>The accumulation of NH<sub>3</sub><sup>+</sup> dendrons near the top of the biofilm is due to strong, electrostatic double-layer mediated adhesion of dendrons, hindering their penetration to deeper layers. The OH and negatively charged COO<sup>-</sup> dendrons migrate deeper into the biofilms, since they experience no electrostatic double-layer attraction with the channel walls and weak Lifshitz-van der Waals attraction.</p> | [22] |
|                | Ionic and PEG-modified liposomes                                                      | –                                                                 | <i>P. aeruginosa</i> PAO-1 | JCM 14847  | –                                                                                                                                                                                                                                                                                                                                                                                                                                                                                                                                                                                                                | [23] |
| Phytochemicals | <i>Hypericum lydiium</i> extract                                                      | –                                                                 | <i>E. coli</i>             | ATCC 25922 | –                                                                                                                                                                                                                                                                                                                                                                                                                                                                                                                                                                                                                | [24] |
|                |                                                                                       |                                                                   | <i>S. aureus</i>           | ATCC 29213 |                                                                                                                                                                                                                                                                                                                                                                                                                                                                                                                                                                                                                  |      |

|  |                                                                                                                       |                                               |                           |                                             |                                                                                                                                                                                                                                                                                   |      |
|--|-----------------------------------------------------------------------------------------------------------------------|-----------------------------------------------|---------------------------|---------------------------------------------|-----------------------------------------------------------------------------------------------------------------------------------------------------------------------------------------------------------------------------------------------------------------------------------|------|
|  |                                                                                                                       |                                               | MRSA                      | Clinical isolate(s)                         |                                                                                                                                                                                                                                                                                   |      |
|  | <i>Cochlospermum regium</i> leaf extract                                                                              | –                                             | <i>S. aureus</i>          | ATCC 25923                                  | Phenolic compounds of the extract cause changes in membrane permeability, decreased enzymatic activity and depletion of substrates and metal ions.<br><br>Gallic acid interferes with the genetic regulation of the biofilm formation process, reducing the production of EPS.    | [25] |
|  |                                                                                                                       |                                               | MRSA                      | Clinical isolate(s)                         |                                                                                                                                                                                                                                                                                   |      |
|  | <i>Persea americana</i> seed extract                                                                                  | Topical application of gel-based formulations | <i>S. aureus</i>          | ATCC 25923 and clinical isolate(s)          | Perturbation of the cell membrane, leakage of intracellular liquid, incapacity of the membrane to regulate the internal pH and inactivate the respiratory chain of dehydrogenase.                                                                                                 | [26] |
|  |                                                                                                                       |                                               | <i>E. coli</i>            | ATCC 8739 and clinical isolate(s)           |                                                                                                                                                                                                                                                                                   |      |
|  |                                                                                                                       |                                               | <i>P. aeruginosa</i> PA01 | –                                           |                                                                                                                                                                                                                                                                                   |      |
|  | <i>Iris</i> species ( <i>I. confusa</i> , <i>I. pseudacorus</i> and <i>I. germanica</i> ) rhizome and root extracts   | –                                             | <i>S. aureus</i>          | MTCC 87, ATCC 29213 and clinical isolate(s) | <i>I. germanica</i> extract causes impairment in phospholipid biosynthesis of the bacterial cell membrane.<br><br>Interference with the QS system, inactivation of bacterial adhesins and enzymes, altering the cell-substratum interactions, cell membrane, and adherence phase. | [27] |
|  |                                                                                                                       |                                               | <i>B. sphaericus</i>      | MTCC 511                                    |                                                                                                                                                                                                                                                                                   |      |
|  |                                                                                                                       |                                               | <i>E. coli</i>            | MTCC 443                                    |                                                                                                                                                                                                                                                                                   |      |
|  |                                                                                                                       |                                               | <i>E. aerogenes</i>       | MTCC 111                                    |                                                                                                                                                                                                                                                                                   |      |
|  | <i>Curcuma</i> species ( <i>C. longa</i> , <i>C. caesia</i> and <i>C. aromatica</i> ) flavonoid and alkaloid extracts | –                                             | <i>S. aureus</i>          | MTCC 96                                     | Curcumin suppresses <i>B. subtilis</i> cytokinesis through induction of filamentation, segregation and organization of the nucleoids.<br><br>Curcumin reduces biofilm initiation genes, inhibits QS genes and down-regulates different virulence factors.                         | [28] |
|  |                                                                                                                       |                                               | <i>B. subtilis</i>        | MTCC 441                                    |                                                                                                                                                                                                                                                                                   |      |
|  | <i>Frangula alnus</i> bark extract                                                                                    | –                                             | <i>S. aureus</i>          | ATCC 25923 and clinical isolate(s)          | Inhibition of biofilm formation through the blockade of cell respiration.<br><br>Disturbance of cell membrane and cell lysis.                                                                                                                                                     | [29] |
|  |                                                                                                                       |                                               | MRSA                      | ATCC 43300 and clinical isolate(s)          |                                                                                                                                                                                                                                                                                   |      |
|  |                                                                                                                       | –                                             | <i>C. albicans</i>        | NCIM 3466                                   |                                                                                                                                                                                                                                                                                   | [30] |

|  |                                             |   |                           |            |                                                                                                                                                                                                                                                                                                                                                                                                                                                                                                                                                                                                                                                                                                                                     |      |
|--|---------------------------------------------|---|---------------------------|------------|-------------------------------------------------------------------------------------------------------------------------------------------------------------------------------------------------------------------------------------------------------------------------------------------------------------------------------------------------------------------------------------------------------------------------------------------------------------------------------------------------------------------------------------------------------------------------------------------------------------------------------------------------------------------------------------------------------------------------------------|------|
|  | <i>Hymenocallis littoralis</i> leaf extract |   |                           |            | <p>The identified phytochemicals in the extract bind at the active site residues of adhesin proteins, sortase A and Als3, and inhibits substrate binding, preventing the adhesion process of biofilm formation.</p> <p>The phytochemicals antioxidant activity helps to reduce excessive ROS generation by the wounded cells, improving wound healing.</p>                                                                                                                                                                                                                                                                                                                                                                          |      |
|  |                                             |   | <i>S. aureus</i>          | NCIM 2654  |                                                                                                                                                                                                                                                                                                                                                                                                                                                                                                                                                                                                                                                                                                                                     |      |
|  |                                             |   | <i>B. subtilis</i>        | NCIM 2653  |                                                                                                                                                                                                                                                                                                                                                                                                                                                                                                                                                                                                                                                                                                                                     |      |
|  |                                             |   | <i>S. typhimurium</i>     | NCIM 2501  |                                                                                                                                                                                                                                                                                                                                                                                                                                                                                                                                                                                                                                                                                                                                     |      |
|  |                                             |   | <i>P. vulgaris</i>        | NCIM 2813  |                                                                                                                                                                                                                                                                                                                                                                                                                                                                                                                                                                                                                                                                                                                                     |      |
|  | <i>Callistemon citrinus</i> extract         | – | <i>S. aureus</i>          | ATCC 25923 | <p>Phenolic compounds of the extract have intrinsic acidic characteristics which generate a lethal environment against bacteria.</p> <p>Phenolic compounds modulate QS, interfere with surface hydrophobicity, mobility and charge, and down-regulate biofilm formation genes.</p> <p>Damage to bacterial cell membranes and leakage of cytoplasm constituents.</p>                                                                                                                                                                                                                                                                                                                                                                 | [31] |
|  |                                             |   | MRSA                      | ATCC 33591 |                                                                                                                                                                                                                                                                                                                                                                                                                                                                                                                                                                                                                                                                                                                                     |      |
|  | <i>Myrtus communis</i> leaf extract         | – | <i>C. violaceum</i>       | ATCC 12472 | <p>Reduced proteolytic lytic (total protease) activity and decreased production of QS controlled virulence determinants in <i>C. violaceum</i> (violacein), <i>P. aeruginosa</i> (elastase, protease, pyocyanin and chitinase) and <i>S. marcescens</i> (prodigiosin and protease).</p> <p>EPS production is controlled by bacterial QS mechanism. Therefore, an impaired EPS secretion leads to structurally fragile and antibiotic sensitive biofilm, facilitating its eradication.</p> <p>The flagellar mediated swarming motility requires QS-controlled differentiation of normal bacterial cells into swarm cell morphology. However, the phytochemicals of the extract interfere with either the differentiation process</p> | [32] |
|  |                                             |   | <i>E. coli</i>            | ATCC 35218 |                                                                                                                                                                                                                                                                                                                                                                                                                                                                                                                                                                                                                                                                                                                                     |      |
|  |                                             |   | <i>P. aeruginosa</i> PAO1 | –          |                                                                                                                                                                                                                                                                                                                                                                                                                                                                                                                                                                                                                                                                                                                                     |      |
|  |                                             |   | <i>S. marcescens</i>      | ATCC 13880 |                                                                                                                                                                                                                                                                                                                                                                                                                                                                                                                                                                                                                                                                                                                                     |      |
|  |                                             |   | <i>A. baumannii</i>       | ATCC BAA-7 |                                                                                                                                                                                                                                                                                                                                                                                                                                                                                                                                                                                                                                                                                                                                     |      |



|  |                                                                                                                    |                                                                |                           |                                    |                                                                                                                                                                                                                                                                                                                                                                       |      |
|--|--------------------------------------------------------------------------------------------------------------------|----------------------------------------------------------------|---------------------------|------------------------------------|-----------------------------------------------------------------------------------------------------------------------------------------------------------------------------------------------------------------------------------------------------------------------------------------------------------------------------------------------------------------------|------|
|  |                                                                                                                    |                                                                |                           |                                    | <p>or act directly on the receptors involved in the QS system.</p> <p>Linalool causes inhibition of acyl-homoserine lactone signal molecule synthesis, antagonization of QS-regulatory proteins, and blockade of the receptor proteins.</p>                                                                                                                           |      |
|  | Parthenolide                                                                                                       | –                                                              | <i>P. aeruginosa</i> PAO1 | –                                  | Parthenolide has affinity towards the regulatory proteins of the QS circuit, resulting in down-regulation of various virulence factors, such as pyocyanin, protease and swarming motility, thereby significantly reducing biofilm formation.                                                                                                                          | [33] |
|  | Ursolic acid and its amide derivatives,<br><br>N-(2',4'-dinitrophenyl)-3 $\beta$ -hydroxyurs-12-en-28-carbonamide) | –                                                              | <i>A. baumannii</i>       | ATCC 19606 and clinical isolate(s) | <p>Down-regulation in gene expression of biofilm-forming proteins that engage in cell adhesion, as well as QS regulator genes.</p> <p>Powerful membrane disruptor agent, causes depolarization of the bacterial cell membrane, resulting in loss of cytoplasmatic content and cell death.</p>                                                                         | [34] |
|  | <i>Capsicum baccatum</i> fruit and seed extract                                                                    | Coating of polymeric surfaces                                  | <i>P. aeruginosa</i> PA14 | –                                  | The coating inhibits bacterial attachment by a mechanism based on electrostatic repulsion, high hydrophilicity and steric hindrance that blocks bacterium-substratum interactions.                                                                                                                                                                                    | [35] |
|  |                                                                                                                    |                                                                | <i>S. epidermidis</i>     | ATCC 35984                         |                                                                                                                                                                                                                                                                                                                                                                       |      |
|  | Ferulic acid + chitosan + bioactive glass                                                                          | Coating of metallic surfaces                                   | <i>S. aureus</i>          | –                                  | <p>Ferulic acid induces modifications in the bacterial cell membrane, changes in hydrophobicity and local rupture of cell membrane with consequent leakage of intracellular bacterial components.</p> <p>The combination of Chitosan/bioactive glass with ferulic acid causes changes in bacterial permeability, lysis and subsequently death of bacterial cells.</p> | [36] |
|  |                                                                                                                    |                                                                | <i>E. coli</i>            | –                                  |                                                                                                                                                                                                                                                                                                                                                                       |      |
|  | <i>Piper nigrum</i> ,<br><i>Cuminum cyminum</i> , <i>C.longa</i> and <i>Cinnamomum</i>                             | Combination of essential oils (synergy between phytochemicals) | <i>B. subtilis</i>        | ATCC 6633                          | Essential oils disrupt and damage the cellular membrane integrity due to interactions between hydrophobic phytochemicals and phospholipids of the membrane.                                                                                                                                                                                                           | [37] |
|  |                                                                                                                    |                                                                | <i>S. aureus</i>          | ATCC 9144                          |                                                                                                                                                                                                                                                                                                                                                                       |      |
|  |                                                                                                                    |                                                                | <i>S. epidermidis</i> S61 | –                                  |                                                                                                                                                                                                                                                                                                                                                                       |      |
|  |                                                                                                                    |                                                                | <i>M. luteus</i>          | –                                  |                                                                                                                                                                                                                                                                                                                                                                       |      |

|  |                                                                                                                                  |                              |                              |                                                  |                                                                                                                                                                                                                                                                                                                                                                                                                                                                                                                                                                                                                                                                                                                                      |      |
|--|----------------------------------------------------------------------------------------------------------------------------------|------------------------------|------------------------------|--------------------------------------------------|--------------------------------------------------------------------------------------------------------------------------------------------------------------------------------------------------------------------------------------------------------------------------------------------------------------------------------------------------------------------------------------------------------------------------------------------------------------------------------------------------------------------------------------------------------------------------------------------------------------------------------------------------------------------------------------------------------------------------------------|------|
|  | <i>verum</i> essential oils                                                                                                      |                              | <i>L. monocytogenes</i>      | –                                                | Eugenol present in <i>C. verum</i> essential oil has strong antibacterial activity due to the methyl group in the $\gamma$ position and double bond in $\alpha$ , $\beta$ positions of the side chain.<br><br>The overall antibacterial activity of the combination results from the synergistic effect between molecules.                                                                                                                                                                                                                                                                                                                                                                                                           |      |
|  |                                                                                                                                  |                              | <i>P. savastoni</i>          | –                                                |                                                                                                                                                                                                                                                                                                                                                                                                                                                                                                                                                                                                                                                                                                                                      |      |
|  |                                                                                                                                  |                              | <i>E. coli</i>               | ATCC 10536                                       |                                                                                                                                                                                                                                                                                                                                                                                                                                                                                                                                                                                                                                                                                                                                      |      |
|  |                                                                                                                                  |                              | <i>S. enterica</i> CIP 80.39 | –                                                |                                                                                                                                                                                                                                                                                                                                                                                                                                                                                                                                                                                                                                                                                                                                      |      |
|  |                                                                                                                                  |                              | <i>Erwinia sp.</i>           | –                                                |                                                                                                                                                                                                                                                                                                                                                                                                                                                                                                                                                                                                                                                                                                                                      |      |
|  | Lectin from <i>Alpinia purpurata</i> inflorescence bract extract (ApuL) + oxacillin, ceftazidime, or fluconazole                 | Combination with antibiotics | <i>P. aeruginosa</i>         | UFPEDA-416, UFPEDA-261 and UFPEDA-262            | Impairment of microorganism cells viability.<br><br>Lectins interact with microbial cell wall components such as teichoic and teicuronic acids, peptidoglycans and lipopolysaccharides, triggering growth inhibition, damage to cellular integrity, alteration of membrane permeability and nutrient uptake, induction of oxidative stress, and damage to respiratory processes.<br><br>Lectins bind to chitin, chitin oligomers, cellulose and other saccharides in the cell walls, inhibiting fungal growth. Also, lectins cause oxidative stress and energetic collapse and enter fungal cells, blocking enzymes involved in synthesis of wall polymers.<br><br>Synergism was detected for ApuL-ceftazidime and ApuL-fluconazole. | [38] |
|  |                                                                                                                                  |                              | <i>S. aureus</i>             | UFPEDA-02, UFPEDA-670, UFPEDA-671 and UFPEDA-672 |                                                                                                                                                                                                                                                                                                                                                                                                                                                                                                                                                                                                                                                                                                                                      |      |
|  |                                                                                                                                  |                              | <i>C. albicans</i>           | URM 5901                                         |                                                                                                                                                                                                                                                                                                                                                                                                                                                                                                                                                                                                                                                                                                                                      |      |
|  |                                                                                                                                  |                              | <i>C. parapsilosis</i>       | URM 6345                                         |                                                                                                                                                                                                                                                                                                                                                                                                                                                                                                                                                                                                                                                                                                                                      |      |
|  | Polyphenol-rich fraction of <i>Dicranopteris linearis</i> + gentamicin, chloramphenicol, penicillin G, vancomycin, or ampicillin | Combination with antibiotics | <i>S. aureus</i>             | ATCC 29213                                       | –                                                                                                                                                                                                                                                                                                                                                                                                                                                                                                                                                                                                                                                                                                                                    | [39] |
|  |                                                                                                                                  |                              | <i>P. aeruginosa</i>         | ATCC 27853                                       |                                                                                                                                                                                                                                                                                                                                                                                                                                                                                                                                                                                                                                                                                                                                      |      |
|  |                                                                                                                                  |                              | MRSA                         | ATCC 43300                                       |                                                                                                                                                                                                                                                                                                                                                                                                                                                                                                                                                                                                                                                                                                                                      |      |

|  |                                                                                         |                              |                      |                     |                                                                                                                                                                                                                                                                                                                 |      |
|--|-----------------------------------------------------------------------------------------|------------------------------|----------------------|---------------------|-----------------------------------------------------------------------------------------------------------------------------------------------------------------------------------------------------------------------------------------------------------------------------------------------------------------|------|
|  | <i>Euterpe oleracea</i> fruit extract + ciprofloxacin, erythromycin, or chloramphenicol | Combination with antibiotics | <i>S. aureus</i>     | Clinical isolate(s) | Flavonoids present in the extract cause membrane rupture, inhibition of nucleic acid synthesis, inhibition of DNA gyrase, and hampering cytoplasmic membrane functions and oxygen consumption.                                                                                                                  | [40] |
|  | Curcumin + oxacillin                                                                    | Combination with antibiotics | <i>S. aureus</i>     | ATCC 6538P          | Curcumin increases permeability of bacterial membrane, impairs cell metabolism and causes bacterial death.                                                                                                                                                                                                      | [41] |
|  |                                                                                         |                              | MRSA                 | Clinical isolate(s) | Curcumin causes damage to the genetic material, i.e., DNA fragmentation, which together with changes in membrane integrity leads to cell death by apoptotic processes.                                                                                                                                          |      |
|  | Rutin (vitamin P) + gentamicin                                                          | Combination with antibiotics | <i>P. aeruginosa</i> | MTCC 2488           | Rutin, gentamicin and combination of rutin-gentamicin induce cell wall disruption, increase cell membrane permeability and reduce cell density.<br><br>Rutin acts as pro-oxidant, induces the generation of ROS that damage the cell membrane, DNA and proteins due to oxidative stress, leading to cell death. | [42] |

**Notes:** NPs – nanoparticles; AgNPs – silver nanoparticles; DNA – deoxyribonucleic acid; ROS – reactive oxygen species; TCA – *trans*-cinnamic acid; “Cinn” – natural cinnamon bark extract; PI – povidone-iodine; PGA – polyglycolic acid; TIAB – molecular system incorporating Ag<sup>+</sup> ions combined with TiO<sub>2</sub>; ATP – adenosine triphosphate; QS – quorum sensing; MRSA – methicillin resistant *Staphylococcus aureus*; CaPNPs – calcium phosphate nanoparticles; Ti6Al4V – titanium, aluminum and vanadium alloy scaffold; PEI – poly-ethylenimine; DMNs – dissolving microneedles; PCL – poly(ε-caprolactone); PLGA – poly(lactic-co-glycolic acid); CAR – carvacrol; EPS – extracellular polymeric substance; PDA – polydopamine; NIR – near-infrared; eDNA – environmental DNA; <sup>D</sup>/L-Glu – chiral glutamic acid; AuNBPs – gold nanobipyramids; AuNPs – gold nanoparticles; MNPS-NPs – magnetic nanoporous silica nanoparticles; ZnO-NPs – zinc oxide nanoparticles; PVC – poly(vinyl chloride); UV – ultraviolet; PAA IO-NPs – poly(acrylic acid) capped iron oxide (IO) nanoparticles; NH<sub>2</sub>-FF-COOH – diphenylalanine (FF) peptide nanotubes with amino (-NH<sub>2</sub>) and carboxylic acid (-COOH) terminal functional groups; PEG – polyethylene glycol. Microorganism sources: ATCC – American Type Culture Collection; CCM – Czech Collection of Microorganisms; DMST – Department of Medical Sciences Thailand; MTCC – Microbial Type Culture Collection; NCIM – National Collection of Industrial Microorganisms; NCTC – National Collection of Type Cultures; JCM – Japan Collection of Microorganisms; UFPEDA – Collection of microorganism cultures from the Antibiotics Department of the Federal University of Pernambuco; URM – “University Recife Mycologia”, URM Mycotheca Culture Collection of the Department of Mycology of the Center for Biological Sciences of the Federal University of Pernambuco; WDCM – World Data Center for Microorganisms.

## References

- Baygar, T.; Sarac, N.; Ugur, A.; Karaca, I.R. Antimicrobial Characteristics and Biocompatibility of the Surgical Sutures Coated with Biosynthesized Silver Nanoparticles. *Bioorgan. Chem.* **2019**, *86*, 254–258, <https://doi.org/10.1016/j.bioorg.2018.12.034>.
- Syukri, D.M.; Nwabor, O.F.; Singh, S.; Ontong, J.C.; Wunnoo, S.; Paosen, S.; Munah, S.; Voravuthikunchai, S.P. Antibacterial-Coated Silk Surgical Sutures by Ex Situ Deposition of Silver Nanoparticles Synthesized with *Eucalyptus camaldulensis* Eradicates Infections. *J. Microbiol. Methods* **2020**, *174*, 105955, <https://doi.org/10.1016/j.mimet.2020.105955>.
- Edis, Z.; Haj Bloukh, S.; Ibrahim, M.R.; Abu Sara, H. “Smart” Antimicrobial Nanocomplexes with Potential to Decrease Surgical Site Infections (SSI). *Pharmaceutics* **2020**, *12*, 361, <https://doi.org/10.3390/pharmaceutics12040361>.
- Syukri, D.M.; Nwabor, O.F.; Singh, S.; Voravuthikunchai, S.P. Antibacterial Functionalization of Nylon Monofilament Surgical Sutures through In Situ Deposition of Biogenic Silver Nanoparticles. *Surf. Coat. Technol.* **2021**, *413*, 127090, <https://doi.org/10.1016/j.surfcoat.2021.127090>.
- Puca, V.; Traini, T.; Guarnieri, S.; Carradori, S.; Sisto, F.; Macchione, N.; Muraro, R.; Mincione, G.; Grande, R. The Antibiofilm Effect of a Medical Device Containing TIAB on Microorganisms Associated with Surgical Site Infection. *Molecules* **2019**, *24*, 2280, <https://doi.org/10.3390/molecules24122280>.
- Xiang, J.; Zhu, R.; Lang, S.; Yan, H.; Liu, G.; Peng, B. Mussel-Inspired Immobilization of Zwitterionic Silver Nanoparticles toward Antibacterial Cotton Gauze for Promoting Wound Healing. *Chem. Eng. J.* **2021**, *409*, 128291, <https://doi.org/10.1016/j.cej.2020.128291>.
- Ständert, V.; Borchering, K.; Bormann, N.; Schmidmaier, G.; Grunwald, I.; Wildemann, B. Antibiotic-Loaded Amphora-Shaped Pores on a Titanium Implant Surface Enhance Osteointegration and Prevent Infections. *Bioact. Mater.* **2021**, *6*, 2331–2345, <https://doi.org/10.1016/j.bioactmat.2021.01.012>.
- Surmeneva, M.; Lapanje, A.; Chudinova, E.; Ivanova, A.; Koptug, A.; Loza, K.; Prymak, O.; Epple, M.; Ennen-Roth, F.; Ulbricht, M.; et al. Decreased Bacterial Colonization of Additively Manufactured Ti6Al4V Metallic Scaffolds with Immobilized Silver and Calcium Phosphate Nanoparticles. *Appl. Surf. Sci.* **2019**, *480*, 822–829, <https://doi.org/10.1016/j.apsusc.2019.03.003>.
- Permana, A.D.; Anjani, Q.K.; Sartini; Utomo, E.; Volpe-Zanutto, F.; Paredes, A.J.; Evary, Y.M.; Mardikasari, S.A.; Pratama, M.R.; Tuany, I.N.; et al. Selective Delivery of Silver Nanoparticles for Improved Treatment of Biofilm Skin Infection Using Bacteria-Responsive Microparticles Loaded into Dissolving Microneedles. *Mater. Sci. Eng. C* **2021**, *120*, 111786, <https://doi.org/10.1016/j.msec.2020.111786>.
- Permana, A.D.; Mir, M.; Utomo, E.; Donnelly, R.F. Bacterially Sensitive Nanoparticle-Based Dissolving Microneedles of Doxycycline for Enhanced Treatment of Bacterial Biofilm Skin Infection: A Proof of Concept Study. *Int. J. Pharm. X* **2020**, *2*, 100047, <https://doi.org/10.1016/j.ijpx.2020.100047>.
- Mir, M.; Permana, A.D.; Tekko, I.A.; McCarthy, H.O.; Ahmed, N.; Rehman, A.; Donnelly, R.F. Microneedle Liquid Injection System Assisted Delivery of Infection Responsive Nanoparticles: A Promising Approach for Enhanced Site-Specific Delivery of Carvacrol against Polymicrobial Biofilms-Infected Wounds. *Int. J. Pharm.* **2020**, *587*, 119643, <https://doi.org/10.1016/j.ijpharm.2020.119643>.
- Mir, M.; Ahmed, N.; Permana, A.D.; Rodgers, A.M.; Donnelly, R.F.; Rehman, A. Enhancement in Site-Specific Delivery of Carvacrol against Methicillin Resistant *Staphylococcus aureus* Induced Skin Infections Using Enzyme Responsive Nanoparticles: A Proof of Concept Study. *Pharmaceutics* **2019**, *11*, 606, <https://doi.org/10.3390/pharmaceutics11110606>.
- Gao, R.; van der Mei, H.C.; Ren, Y.; Chen, H.; Chen, G.; Busscher, H.J.; Peterson, B.W. Thermo-Resistance of ESKAPE-Panel Pathogens, Eradication and Growth Prevention of an Infectious Biofilm by Photothermal, Polydopamine-Nanoparticles In Vitro. *Nanomed. Nanotechnol. Biol. Med.* **2021**, *32*, 102324, <https://doi.org/10.1016/j.nano.2020.102324>.
- Zhang, M.; Zhang, H.; Feng, J.; Zhou, Y.; Wang, B. Synergistic Chemotherapy, Physiotherapy and Photothermal Therapy against Bacterial and Biofilms Infections through Construction of Chiral Glutamic Acid Functionalized Gold Nanobipyramids. *Chem. Eng. J.* **2020**, *393*, 124778, <https://doi.org/10.1016/j.cej.2020.124778>.
- Kirui, D.K.; Weber, G.; Talackine, J.; Millenbaugh, N.J. Targeted Laser Therapy Synergistically Enhances Efficacy of Antibiotics against Multi-Drug Resistant *Staphylococcus aureus* and *Pseudomonas aeruginosa* Biofilms. *Nanomed. Nanotechnol. Biol. Med.* **2019**, *20*, 102018, <https://doi.org/10.1016/j.nano.2019.102018>.
- Reifenrath, J.; Janßen, H.C.; Warwas, D.P.; Kietzmann, M.; Behrens, P.; Willbold, E.; Fedchenko, M.; Angrisani, N. Implant-Based Direction of Magnetic Nanoporous Silica Nanoparticles—Influence of Macrophage Depletion and Infection. *Nanomed. Nanotechnol. Biol. Med.* **2020**, *30*, 102289, <https://doi.org/10.1016/j.nano.2020.102289>.
- Kurniawan, F.H.; Chinavinikula, P.; Nasongkla, N. Hydrophobic and Antibacterial Bed Sheet Using ZnO Nanoparticles: A Large-Scale Technique. *J. Drug Deliv. Sci. Technol.* **2021**, *62*, 102339, <https://doi.org/10.1016/j.jddst.2021.102339>.
- Kapustová, M.; Puškárová, A.; Bučková, M.; Granata, G.; Napoli, E.; Annušová, A.; Mesárošová, M.; Kozics, K.; Pangallo, D.; Geraci, C. Biofilm Inhibition by Biocompatible Poly( $\epsilon$ -Caprolactone) Nanocapsules Loaded with Essential Oils and Their Cyto/Genotoxicity to Human Keratinocyte Cell Line. *Int. J. Pharm.* **2021**, *606*, 120846, <https://doi.org/10.1016/j.ijpharm.2021.120846>.
- Shang, B.; Xu, M.; Zhi, Z.; Xi, Y.; Wang, Y.; Peng, B.; Li, P.; Deng, Z. Synthesis of Sandwich-Structured Silver@Polydopamine@Silver Shells with Enhanced Antibacterial Activities. *J. Colloid Interface Sci.* **2020**, *558*, 47–54, <https://doi.org/10.1016/j.jcis.2019.09.091>.
- Nie, L.; Chang, P.; Ji, C.; Zhang, F.; Zhou, Q.; Sun, M.; Sun, Y.; Politis, C.; Shavandi, A. Poly(Acrylic Acid) Capped Iron Oxide Nanoparticles via Ligand Exchange with Antibacterial Properties for Biofilm Applications. *Colloids Surf. B Biointerfaces* **2021**, *197*, 111385, <https://doi.org/10.1016/j.colsurfb.2020.111385>.
- Porter, S.L.; Coulter, S.M.; Pentlavalli, S.; Thompson, T.P.; Laverty, G. Self-Assembling Diphenylalanine Peptide Nanotubes Selectively Eradicate Bacterial Biofilm Infection. *Acta Biomater.* **2018**, *77*, 96–105, <https://doi.org/10.1016/j.actbio.2018.07.033>.
- Rozenbaum, R.T.; Andrén, O.C.J.; van der Mei, H.C.; Woudstra, W.; Busscher, H.J.; Malkoch, M.; Sharma, P.K. Penetration and Accumulation of Dendrons with Different Peripheral Composition in *Pseudomonas aeruginosa* Biofilms. *Nano Lett.* **2019**, *19*, 4327–4333, <https://doi.org/10.1021/acs.nanolett.9b00838>.

23. Ibaraki, H.; Kanazawa, T.; Chien, W.-Y.; Nakaminami, H.; Aoki, M.; Ozawa, K.; Kaneko, H.; Takashima, Y.; Noguchi, N.; Seta, Y. The Effects of Surface Properties of Liposomes on Their Activity against *Pseudomonas aeruginosa* PAO-1 Biofilm. *J. Drug Deliv. Sci. Technol.* **2020**, *57*, 101754, <https://doi.org/10.1016/j.jddst.2020.101754>.
24. Aygül, A.; Şerbetçi, T. The Antibacterial and Antivirulent Potential of *Hypericum lydiu*m against *Staphylococcus aureus*: Inhibition of Growth, Biofilm Formation, and Hemolytic Activity. *Eur. J. Integr. Med.* **2020**, *35*, 101061, <https://doi.org/10.1016/j.eujim.2020.101061>.
25. Galvão, F.O.; Dantas, F.G.S.; Santos, C.R.L.; Marchioro, S.B.; Cardoso, C.A.L.; Wender, H.; Sangalli, A.; Almeida-Apolonio, A.A.; Oliveira, K.M.P. *Cochlospermum regium* (Schrank) Pilger Leaf Extract Inhibit Methicillin-Resistant *Staphylococcus aureus* Biofilm Formation. *J. Ethnopharmacol.* **2020**, *261*, 113167, <https://doi.org/10.1016/j.jep.2020.113167>.
26. Ekom, S.E.; Tamokou, J.-D.-D.; Kuete, V. Methanol Extract from the Seeds of *Persea americana* Displays Antibacterial and Wound Healing Activities in Rat Model. *J. Ethnopharmacol.* **2022**, *282*, 114573, <https://doi.org/10.1016/j.jep.2021.114573>.
27. Okba, M.M.; Abdel Baki, P.M.; Abu-Elghait, M.; Shehabeldine, A.M.; El-Sherei, M.M.; Khaleel, A.E.; Salem, M.A. UPLC-ESI-MS/MS Profiling of the Underground Parts of Common *Iris* Species in Relation to Their Anti-Virulence Activities against *Staphylococcus aureus*. *J. Ethnopharmacol.* **2022**, *282*, 114658, <https://doi.org/10.1016/j.jep.2021.114658>.
28. Jain, A.; Parihar, D.K. Antibacterial, Biofilm Dispersal and Antibiofilm Potential of Alkaloids and Flavonoids of *Curcuma*. *Biocatal. Agric. Biotechnol.* **2018**, *16*, 677–682, <https://doi.org/10.1016/j.bcab.2018.09.023>.
29. Đukanović, S.; Cvetković, S.; Lončarević, B.; Lješević, M.; Nikolić, B.; Simin, N.; Bekvalac, K.; Kekić, D.; Mitić-Ćulafić, D. Antistaphylococcal and Biofilm Inhibitory Activities of *Frangula alnus* Bark Ethyl-Acetate Extract. *Ind. Crop. Prod.* **2020**, *158*, 113013, <https://doi.org/10.1016/j.indcrop.2020.113013>.
30. Nadaf, N.H.; Parulekar, R.S.; Patil, R.S.; Gade, T.K.; Momin, A.A.; Waghmare, S.R.; Dhanavade, M.J.; Arvindekar, A.U.; Sonawane, K.D. Biofilm Inhibition Mechanism from Extract of *Hymenocallis littoralis* Leaves. *J. Ethnopharmacol.* **2018**, *222*, 121–132, <https://doi.org/10.1016/j.jep.2018.04.031>.
31. Shehabeldine, A.M.; Ashour, R.M.; Okba, M.M.; Saber, F.R. *Callistemon citrinus* Bioactive Metabolites as New Inhibitors of Methicillin-Resistant *Staphylococcus aureus* Biofilm Formation. *J. Ethnopharmacol.* **2020**, *254*, 112669, <https://doi.org/10.1016/j.jep.2020.112669>.
32. Alyousef, A.A.; Mabood Husain, F.; Arshad, M.; Rizwan Ahamad, S.; Shavez Khan, M.; Abul Qais, F.; Khan, A.; Alqasim, A.; Almutairi, N.; Ahmad, I.; et al. *Myrtus communis* and Its Bioactive Phytoconstituent, Linalool, Interferes with Quorum Sensing Regulated Virulence Functions and Biofilm of Uropathogenic Bacteria: In Vitro and In Silico Insights. *J. King Saud Univ. Sci.* **2021**, *33*, 101588, <https://doi.org/10.1016/j.jksus.2021.101588>.
33. Kalia, M.; Yadav, V.K.; Singh, P.K.; Sharma, D.; Narvi, S.S.; Agarwal, V. Exploring the Impact of Parthenolide as Anti-Quorum Sensing and Anti-Biofilm Agent against *Pseudomonas aeruginosa*. *Life Sci.* **2018**, *199*, 96–103, <https://doi.org/10.1016/j.lfs.2018.03.013>.
34. Usmani, Y.; Ahmed, A.; Faizi, S.; Versiani, M.A.; Shamshad, S.; Khan, S.; Simjee, S.U. Antimicrobial and Biofilm Inhibiting Potential of an Amide Derivative [N-(2', 4'-Dinitrophenyl)-3β-Hydroxyurs-12-En-28-Carbonamide] of Ursolic Acid by Modulating Membrane Potential and Quorum Sensing against Colistin Resistant *Acinetobacter baumannii*. *Microb. Pathog.* **2021**, *157*, 104997, <https://doi.org/10.1016/j.micpath.2021.104997>.
35. von Borowski, R.G.; Zimmer, K.R.; Leonardi, B.F.; Trentin, D.S.; Silva, R.C.; de Barros, M.P.; Macedo, A.J.; Gnoatto, S.C.B.; Gosmann, G.; Zimmer, A.R. Red Pepper *Capsicum baccatum*: Source of Antiadhesive and Antibiofilm Compounds against Nosocomial Bacteria. *Ind. Crop. Prod.* **2019**, *127*, 148–157, <https://doi.org/10.1016/j.indcrop.2018.10.011>.
36. Akhtar, M.A.; Mariotti, C.E.; Conti, B.; Boccaccini, A.R. Electrophoretic Deposition of Ferulic Acid Loaded Bioactive Glass/Chitosan as Antibacterial and Bioactive Composite Coatings. *Surf. Coat. Technol.* **2021**, *405*, 126657, <https://doi.org/10.1016/j.surfcoat.2020.126657>.
37. Jardak, M.; Mnif, S.; Ben Ayed, R.; Rezgui, F.; Aifa, S. Chemical Composition, Antibiofilm Activities of Tunisian Spices Essential Oils and Combinatorial Effect against *Staphylococcus epidermidis* Biofilm. *LWT* **2021**, *140*, 110691, <https://doi.org/10.1016/j.lwt.2020.110691>.
38. Ferreira, G.R.S.; Brito, J.S.; Procópio, T.F.; Santos, N.D.L.; de Lima, B.J.R.C.; Coelho, L.C.B.B.; Navarro, D.M.A.F.; Paiva, P.M.G.; Soares, T.; de Moura, M.C.; et al. Antimicrobial Potential of *Alpinia purpurata* Lectin (ApuL): Growth Inhibitory Action, Synergistic Effects in Combination with Antibiotics, and Antibiofilm Activity. *Microb. Pathog.* **2018**, *124*, 152–162, <https://doi.org/10.1016/j.micpath.2018.08.027>.
39. Lai, C.-S.; Ponnusamy, Y.; Lim, G.-L.; Ramanathan, S. Antibacterial, Antibiofilm and Antibiotic-Potentiating Effects of a Polyphenol-Rich Fraction of *Dicranopteris linearis* (Burm.f.) Underw. *J. Herb. Med.* **2021**, *25*, 100419, <https://doi.org/10.1016/j.hermed.2020.100419>.
40. Dias-Souza, M.V.; dos Santos, R.M.; Cerávolo, I.P.; Cosenza, G.; Ferreira Marçal, P.H.; Figueiredo, F.J.B. *Euterpe oleracea* Pulp Extract: Chemical Analyses, Antibiofilm Activity against *Staphylococcus aureus*, Cytotoxicity and Interference on the Activity of Antimicrobial Drugs. *Microb. Pathog.* **2018**, *114*, 29–35, <https://doi.org/10.1016/j.micpath.2017.11.006>.
41. Neto, J.; Cabral, V.; Nogueira, L.F.; da Silva, C.; Sá, L.; da Silva, A.; da Silva, W.M.; Silva, J.; Marinho, E.S.; Cavalcanti, B.C.; et al. Anti-MRSA Activity of Curcumin in Planktonic Cells and Biofilms and Determination of Possible Action Mechanisms. *Microb. Pathog.* **2021**, *155*, 104892, <https://doi.org/10.1016/j.micpath.2021.104892>.
42. Deepika, M.; Thangam, R.; Sakthidhasan, P.; Arun, S.; Sivasubramanian, S.; Thirumurugan, R. Combined Effect of a Natural Flavonoid Rutin from *Citrus sinensis* and Conventional Antibiotic Gentamicin on *Pseudomonas aeruginosa* Biofilm Formation. *Food Control* **2018**, *90*, 282–294, <https://doi.org/10.1016/j.foodcont.2018.02.044>.
